# Supplementary material
Source: publisher figshare collection journal article supplement (https://acs.figshare.com/ndownloader/files/3866125)
Supplement: Supplementary file 1 [file 3866125]

## Supplemental Information

### **Supplemental Tables and Figures**

|                               |                                                                                                  |     |
|-------------------------------|--------------------------------------------------------------------------------------------------|-----|
| <i>Supplemental Table 1:</i>  | Kinetic characterization of wild-type Rv0045c against fluorogenic ester substrates.              | S2  |
| <i>Supplemental Table 2:</i>  | Biochemical characterization of Rv0045c and Rv0045c loop variants.                               | S3  |
| <i>Supplemental Table 3:</i>  | Substitutions amongst hydrolases similar to Rv0045c.                                             | S4  |
| <i>Supplemental Table 4:</i>  | Biochemical characterization of Rv0045c and Rv0045c active site variants.                        | S5  |
| <i>Supplemental Table 5:</i>  | Biochemical characterization of His187 Rv0045c variants against different fluorogenic substrates | S6  |
| <i>Supplemental Table 6:</i>  | Biochemical characterization of His187 Rv0045c variants                                          | S7  |
| <i>Supplemental Table 7:</i>  | PCR primers used for cloning and site-directed mutagenesis                                       | S8  |
| <i>Supplemental Figure 1:</i> | Protein purification of variants of Rv0045c                                                      | S9  |
| <i>Supplemental Figure 2:</i> | Kinetic activity of Rv0045c                                                                      | S10 |

Supplemental Table 1: Kinetic characterization of wild-type Rv0045c against fluorogenic ester substrates (Figure 1A, 1B).

| Substrate | $k_{\text{cat}}$<br>( $10^{-3} \text{ s}^{-1}$ ) <sup>a</sup> | $K_{\text{m}}$<br>( $\mu\text{M}$ ) | $k_{\text{cat}}/K_{\text{m}}$<br>( $\text{M}^{-1} \text{ s}^{-1}$ ) |
|-----------|---------------------------------------------------------------|-------------------------------------|---------------------------------------------------------------------|
| <b>1</b>  | 0.01 ± 0.001                                                  | 2.2 ± 0.2                           | 5.0 ± 0.4                                                           |
| <b>2</b>  | 0.50 ± 0.06                                                   | 4.0 ± 2.1                           | 120 ± 70                                                            |
| <b>3</b>  | 0.36 ± 0.02                                                   | 1.0 ± 0.2                           | 350 ± 90                                                            |
| <b>4</b>  | 0.10 ± 0.02                                                   | 2.3 ± 0.1                           | 45 ± 2                                                              |
| <b>5</b>  | 0.032 ± 0.001                                                 | 4.4 ± 0.4                           | 7.3 ± 0.7                                                           |
| <b>6</b>  | 11 ± 1                                                        | 1.6 ± 0.5                           | 6600 ± 2100                                                         |
| <b>7</b>  | 1.1 ± 0.1                                                     | 3.7 ± 1.9                           | 290 ± 150                                                           |
| <b>8</b>  | 22 ± 1                                                        | 8.9 ± 1.3                           | 2500 ± 400                                                          |
| <b>9</b>  | 0.011 ± 0.001                                                 | 3.3 ± 0.3                           | 3.4 ± 0.3                                                           |
| <b>10</b> | 0.006 ± 0.003                                                 | 0.52 ± 0.08                         | 13 ± 2                                                              |
| <b>11</b> | 0.16 ± 0.01                                                   | 6.8 ± 0.5                           | 24 ± 2                                                              |
| <b>12</b> | 0.065 ± 0.003                                                 | 3.59 ± 0.64                         | 18 ± 3                                                              |
| <b>13</b> | 0.40 ± 0.02                                                   | 8.7 ± 1.1                           | 48 ± 6                                                              |
| <b>14</b> | 0.0055 ± 0.0004                                               | 1.4 ± 0.3                           | 3.9 ± 1                                                             |
| <b>15</b> | ND <sup>b</sup>                                               | ND                                  | ND                                                                  |
| <b>16</b> | 0.026 ± 0.002                                                 | 2.7 ± 0.5                           | 9.8 ± 2.1                                                           |
| <b>17</b> | 0.050 ± 0.001                                                 | 5.6 ± 0.2                           | 8.9 ± 0.3                                                           |
| <b>18</b> | 0.011 ± 0.001                                                 | 4.1 ± 0.2                           | 2.6 ± 0.2                                                           |
| <b>19</b> | 0.0020 ± 0.0001                                               | 8.5 ± 1.6                           | 270 ± 50                                                            |
| <b>20</b> | ND                                                            | ND                                  | ND                                                                  |
| <b>21</b> | ND                                                            | ND                                  | ND                                                                  |

<sup>a</sup>Kinetic constants for fluorogenic enzyme substrates (Figure 1) were determined by measuring the increase in fluorogenic enzyme substrate fluorescence over time. Data were fitted to a standard Michaelis-Menten equation to determine the values for  $k_{\text{cat}}$ ,  $K_{\text{M}}$ , and  $k_{\text{cat}}/K_{\text{M}}$ . Kinetic measurements for each substrate were repeated three times and the values are given ± SE.

<sup>b</sup>Not determinable. Values were below the detection limit for the assay, determined based on the catalytic activity of S154A Rv0045c.

Supplemental Table 2: Biochemical characterization of Rv0045c and Rv0045c loop variants.

| Rv0045c<br>loop variant | $k_{\text{cat}}$<br>( $10^{-3} \text{ s}^{-1}$ ) <sup>a</sup> | $K_{\text{m}}$<br>( $\mu\text{M}$ ) | $k_{\text{cat}}/K_{\text{m}}$<br>( $\text{M}^{-1} \text{ s}^{-1}$ ) | $T_{\text{m}}$<br>( $^{\circ}\text{C}$ ) <sup>b</sup> |
|-------------------------|---------------------------------------------------------------|-------------------------------------|---------------------------------------------------------------------|-------------------------------------------------------|
| WT                      | $11 \pm 1$                                                    | $1.6 \pm 0.5$                       | $6600 \pm 2100$                                                     | $43 \pm 0.5$                                          |
| Q194A                   | $0.75 \pm 0.08$                                               | $0.27 \pm 0.16$                     | $2800 \pm 1700$                                                     | $42 \pm 0.5$                                          |
| R195A                   | $2.1 \pm 0.1$                                                 | $0.34 \pm 0.11$                     | $6200 \pm 2100$                                                     | $42 \pm 0.5$                                          |
| G196A                   | $7.2 \pm 0.4$                                                 | $0.82 \pm 0.24$                     | $8700 \pm 2600$                                                     | $42 \pm 0.5$                                          |
| T197A                   | $3.0 \pm 0.1$                                                 | $0.72 \pm 0.13$                     | $4100 \pm 800$                                                      | $43 \pm 0.5$                                          |
| V198A                   | $0.45 \pm 0.02$                                               | $0.62 \pm 0.16$                     | $730 \pm 190$                                                       | $43 \pm 0.5$                                          |
| L200A                   | $0.29 \pm 0.02$                                               | $0.29 \pm 0.09$                     | $1000 \pm 300$                                                      | $42 \pm 0.5$                                          |
| M201A                   | $5.9 \pm 0.5$                                                 | $0.87 \pm 0.39$                     | $6800 \pm 3100$                                                     | $42 \pm 0.5$                                          |
| H202A                   | $1.1 \pm 0.1$                                                 | $0.35 \pm 0.11$                     | $3200 \pm 1000$                                                     | $43 \pm 0.5$                                          |
| G203A                   | $0.76 \pm 0.04$                                               | $0.36 \pm 0.10$                     | $2100 \pm 600$                                                      | $43 \pm 0.5$                                          |
| E204A                   | $4.2 \pm 0.2$                                                 | $0.61 \pm 0.12$                     | $6900 \pm 1400$                                                     | $40 \pm 0.5$                                          |

<sup>a</sup>Kinetic constants were determined by measuring the increase in fluorescence over time for Rv0045c or its loop variants against substrate **6** (21). Data were fitted to a standard Michaelis-Menten equation to determine the values for  $k_{\text{cat}}$ ,  $K_{\text{M}}$ , and  $k_{\text{cat}}/K_{\text{M}}$ . Kinetic measurements for each substrate were repeated three times and the values are given  $\pm$  SE.

<sup>b</sup>Values for  $T_{\text{m}}$  were determined by following the change in Sypro Orange fluorescence with increasing temperature. Melting curves were repeated three times for each variant and the  $T_{\text{m}}$  values reported  $\pm$  SE.

Supplemental Table 3: Substitutions among hydrolases similar to Rv0045c.

Part 1: Substitutions in substrate binding and catalytic residues among hydrolases similar to Rv0045c.

| Organism                     | 90 | 92 | 153 | 154 | 155 | 178 | 184 | 187 | 252 | 255 | 282 | 309 | % Identity |
|------------------------------|----|----|-----|-----|-----|-----|-----|-----|-----|-----|-----|-----|------------|
| <i>M. tuberculosis H37Rv</i> | G  | Q  | M   | S   | L   | D   | L   | H   | I   | F   | F   | H   | -          |
| <i>M. marinum</i>            |    |    |     |     |     |     |     |     |     |     |     |     | 79         |
| <i>M. ulcerans</i>           |    |    |     |     |     |     |     |     |     |     |     |     | 78         |
| <i>M. avium</i>              |    |    |     |     |     |     |     |     |     |     |     |     | 77         |
| <i>M. vanbaalenii</i>        |    |    |     |     |     |     | P   |     |     | G   |     |     | 66         |
| <i>M. rhodesiae</i>          |    |    |     |     |     |     | P   |     | F   | G   |     |     | 65         |
| <i>M. smegmatis</i>          |    |    |     |     |     |     | P   |     | F   | G   |     |     | 63         |
| <i>G. polyisoprenivorans</i> |    |    |     |     |     |     | P   | A   |     | A   |     |     | 57         |
| <i>R. jostii</i>             |    |    |     |     |     |     | H   |     | L   | G   |     |     | 52         |
| <i>N. aromatocivorans</i>    |    |    | A   |     |     |     | -   | L   | D   | S   | I   |     | 25         |
| <i>G. proteobacterium</i>    |    |    | A   |     | M   |     | -   | L   | S   | S   | V   |     | 25         |
| <i>A. xylosoxidans</i>       | I  | G  | H   |     | M   |     | -   | F   | P   | A   | Y   |     | 25         |
| <i>R. slithyformis</i>       |    |    | A   |     | M   |     | -   | A   | T   | Q   | V   |     | 24         |
| <i>B. bacteriovorus</i>      | L  | G  | H   |     | M   |     | -   | N   | V   | G   | E   |     | 22         |
| <i>H. influenzae</i>         | L  | G  | H   |     | M   |     | -   | Y   | L   | L   | Y   |     | 20         |
| <i>V. cholerae</i>           | L  | G  | H   |     | M   |     | -   | Y   | V   | L   | Y   |     | 19         |
| <i>E. coli</i>               | L  | G  | H   |     | M   |     | -   | Y   | V   | L   | Y   |     | 17         |

Part 2: Substitutions in flexible loop among hydrolases similar to Rv0045c.

| Organism                     | 194 | 195 | 196 | 197 | 198 | 200 | 201 | 202 | 203 | % Identity |
|------------------------------|-----|-----|-----|-----|-----|-----|-----|-----|-----|------------|
| <i>M. tuberculosis H37Rv</i> | Q   | R   | G   | T   | V   | L   | M   | H   | G   | -          |
| <i>M. marinum</i>            |     |     |     |     |     |     |     |     |     | 79         |
| <i>M. ulcerans</i>           |     |     |     |     |     |     |     |     |     | 78         |
| <i>M. avium</i>              |     | Q   |     |     |     |     |     |     |     | 77         |
| <i>M. vanbaalenii</i>        |     | K   |     |     |     |     | V   | Q   |     | 66         |
| <i>M. rhodesiae</i>          |     | K   |     |     |     |     | V   | Q   |     | 65         |
| <i>M. smegmatis</i>          |     | M   |     |     |     |     | V   | R   | E   | 63         |
| <i>G. polyisoprenivorans</i> | A   | R   |     |     |     |     | I   | R   |     | 57         |
| <i>R. jostii</i>             |     |     |     |     | T   |     | I   | N   |     | 52         |
| <i>N. aromatocivorans</i>    | V   | E   | R   | I   |     | F   |     | T   | A   | 25         |
| <i>G. proteobacterium</i>    | V   |     | R   | I   | I   | F   |     | R   | R   | 25         |
| <i>A. xylosoxidans</i>       |     |     | E   | L   | R   | T   | P   | A   | S   | 25         |
| <i>R. slithyformis</i>       | I   | E   | R   | I   | F   | F   |     | S   | A   | 24         |
| <i>B. bacteriovorus</i>      | E   | Y   | L   | L   | N   | V   | P   | S   | P   | 22         |
| <i>H. influenzae</i>         | N   | G   | L   | F   | A   | K   | N   | A   | K   | 20         |
| <i>V. cholerae</i>           | N   | G   | L   | R   | A   | I   | E   | E   | Q   | 19         |
| <i>E. coli</i>               | A   | A   | I   | N   | A   | S   | E   | S   | D   | 17         |

<sup>a</sup>The amino acid sequence of Rv0045c was aligned using ClustalW <sup>45</sup>. The amino acid numbering corresponds to the amino acid numbering in Rv0045c. The sequences used in the alignment were from *Mycobacterium tuberculosis* H37Rv (NP\_214559.1),



Supplemental Table 4: Biochemical characterization of Rv0045c and Rv0045c active site variants.

| Rv0045c<br>active site<br>variant | $k_{\text{cat}}$<br>( $10^{-3} \text{ s}^{-1}$ ) <sup>a</sup> | $K_{\text{m}}$<br>( $\mu\text{M}$ ) | $k_{\text{cat}}/K_{\text{m}}$<br>( $\text{M}^{-1}\text{s}^{-1}$ ) | $T_{\text{m}}$<br>( $^{\circ}\text{C}$ ) <sup>b</sup> |
|-----------------------------------|---------------------------------------------------------------|-------------------------------------|-------------------------------------------------------------------|-------------------------------------------------------|
| WT                                | 11 ± 1                                                        | 1.6 ± 0.5                           | 6600 ± 2100                                                       | 43 ± 0.5                                              |
| G90A                              | 7.0 ± 0.3                                                     | 0.95 ± 0.21                         | 7400 ± 1700                                                       | 46 ± 0.5                                              |
| Q92A                              | 1.5 ± 0.2                                                     | 0.64 ± 0.28                         | 2300 ± 1100                                                       | 38 ± 0.5                                              |
| M153A                             | 1.7 ± 0.1                                                     | 0.50 ± 0.15                         | 3500 ± 1100                                                       | 46 ± 0.5                                              |
| S154A                             | 0.020 ± 0.001                                                 | 0.32 ± 0.10                         | 63 ± 19                                                           | 44 ± 0.5                                              |
| L155A                             | 1.0 ± 0.5                                                     | 0.51 ± 0.11                         | 2000 ± 400                                                        | 37 ± 0.5                                              |
| D178A                             | 0.20 ± 0.02                                                   | 0.93 ± 0.43                         | 210 ± 100                                                         | 36 ± 0.5                                              |
| L184A                             | 0.64 ± 0.03                                                   | 0.49 ± 0.08                         | 1300 ± 200                                                        | 45 ± 0.5                                              |
| H187A                             | 16 ± 1                                                        | 1.6 ± 0.3                           | 9900 ± 1900                                                       | 42 ± 0.5                                              |
| I252A                             | 4.8 ± 0.3                                                     | 0.51 ± 0.16                         | 9500 ± 2900                                                       | 41 ± 0.5                                              |
| F255A                             | 6.7 ± 0.5                                                     | 0.14 ± 0.06                         | 4900 ± 2300                                                       | 41 ± 0.5                                              |
| F282A                             | 0.19 ± 0.06                                                   | 0.40 ± 0.06                         | 490 ± 90                                                          | 40 ± 0.5                                              |
| H309A                             | 0.062 ± 0.003                                                 | 0.25 ± 0.11                         | 250 ± 110                                                         | 38 ± 0.5                                              |
| G90A H187A                        | 22 ± 2                                                        | 6.8 ± 1.3                           | 3300 ± 600                                                        | 45 ± 0.5                                              |

<sup>a</sup>Kinetic constants were determined by measuring the increase in fluorescence over time for Rv0045c or its loop variants against substrate **6** (21). Data were fitted to a standard Michaelis-Menten equation to determine the values for  $k_{\text{cat}}$ ,  $K_{\text{M}}$ , and  $k_{\text{cat}}/K_{\text{M}}$ . Kinetic measurements for each substrate were repeated three times and the values are given ± SE.

<sup>b</sup>Values for  $T_{\text{m}}$  were determined by following the change in Sypro Orange fluorescence with increasing temperature. Melting curves were repeated three times for each variant and the  $T_{\text{m}}$  values reported ± SE.

Supplemental Table 5: Biochemical characterization of His187 Rv0045c variants against different fluorogenic substrates.

| Rv0045c<br>His187 variant | Fluorogenic Substrate ( $k_{\text{cat}}/K_{\text{m}}$ ( $\text{M}^{-1}\text{s}^{-1}$ )) |              |           |           |           |
|---------------------------|-----------------------------------------------------------------------------------------|--------------|-----------|-----------|-----------|
|                           | <b>3</b>                                                                                | <b>6</b>     | <b>13</b> | <b>14</b> | <b>18</b> |
| WT                        | 100 ± 40                                                                                | 6600 ± 2100  | 4.9 ± 2.0 | 12 ± 1    | 6.7 ± 0.8 |
| G90A                      | 250 ± 100                                                                               | 7400 ± 1700  | 27 ± 6.6  | 17 ± 2    | 25 ± 5    |
| H187A                     | 650 ± 80                                                                                | 9900 ± 1900  | 39 ± 8    | 17 ± 4    | 9.0 ± 0.5 |
| H187Y                     | 2100 ± 800                                                                              | 53000 ± 6000 | 110 ± 10  | 22 ± 4    | 22 ± 4    |
| G90A/H187A                | 20 ± 2                                                                                  | 3300 ± 600   | 3.6 ± 0.4 | 2.6 ± 0.1 | 4.6 ± 0.8 |

<sup>a</sup>Kinetic constants were determined by measuring the increase in fluorescence over time for Rv0045c or its catalytic variants against various substrates (Figure 1) (21). Data were fitted to a standard Michaelis-Menten equation to determine the values for  $k_{\text{cat}}$ ,  $K_{\text{M}}$ , and  $k_{\text{cat}}/K_{\text{M}}$ . Kinetic measurements for each substrate were repeated three times and the values are given ± SE.

Supplemental Table 6: Biochemical characterization of His187 Rv0045c variants.

| Rv0045c<br>His187 variant | $k_{\text{cat}}$<br>( $10^{-3} \text{ s}^{-1}$ ) <sup>a</sup> | $K_{\text{m}}$<br>( $\mu\text{M}$ ) | $k_{\text{cat}}/K_{\text{m}}$<br>( $\text{M}^{-1}\text{s}^{-1}$ ) | $T_{\text{m}}$<br>( $^{\circ}\text{C}$ ) <sup>b</sup> |
|---------------------------|---------------------------------------------------------------|-------------------------------------|-------------------------------------------------------------------|-------------------------------------------------------|
| WT                        | 11 ± 1                                                        | 1.6 ± 0.5                           | 6600 ± 2100                                                       | 43 ± 0.5                                              |
| H187D                     | 3.9 ± 0.2                                                     | 1.4 ± 0.3                           | 2900 ± 600                                                        | 39 ± 0.5                                              |
| H187F                     | 6.8 ± 0.2                                                     | 3.2 ± 0.3                           | 2200 ± 200                                                        | 41 ± 0.5                                              |
| H187G                     | 13 ± 1                                                        | 1.4 ± 0.2                           | 8200 ± 2200                                                       | 39 ± 0.5                                              |
| H187K                     | 6.9 ± 0.3                                                     | 2.2 ± 0.5                           | 3200 ± 700                                                        | 39 ± 0.5                                              |
| H187N                     | 2.0 ± 0.1                                                     | 1.0 ± 0.1                           | 1900 ± 300                                                        | 40.5 ± 0.8                                            |
| H187P                     | 0.90 ± 0.01                                                   | 0.60 ± 0.43                         | 1400 ± 1000                                                       | 41 ± 0.5                                              |
| H187S                     | 5.4 ± 0.2                                                     | 0.60 ± 0.10                         | 9100 ± 1500                                                       | 39 ± 0.5                                              |
| H187V                     | 10 ± 1                                                        | 1.6 ± 0.8                           | 6200 ± 2900                                                       | 40 ± 0.5                                              |
| H187W                     | 14 ± 1                                                        | 6.0 ± 1.7                           | 2400 ± 700                                                        | 43 ± 0.5                                              |
| H187Y                     | 11 ± 1                                                        | 0.21 ± 0.03                         | 53000 ± 6000                                                      | 41.5 ± 0.8                                            |

<sup>a</sup>Kinetic constants were determined by measuring the increase in fluorescence over time for Rv0045c or its loop variants against substrate **6** (21). Data were fitted to a standard Michaelis-Menten equation to determine the values for  $k_{\text{cat}}$ ,  $K_{\text{M}}$ , and  $k_{\text{cat}}/K_{\text{M}}$ . Kinetic measurements for each substrate were repeated three times and the values are given ± SE.

<sup>b</sup>Values for  $T_{\text{m}}$  were determined by following the change in Sypro Orange fluorescence with increasing temperature. Melting curves were repeated three times for each variant and the  $T_{\text{m}}$  values reported ± SE.

Supplemental Table 7: PCR primers used for cloning and site-directed mutagenesis.<sup>a</sup>

| Rv0045c Variant | Primer nucleotide sequence                                       |
|-----------------|------------------------------------------------------------------|
| G90A            | 5'-GGT GAT CTT TCT GCA CGG CGC CGG ACA GAA CGC CCA TAC C-3'      |
| Q92A            | 5'-CTG CAC GGC GGC GGA GCG AAC GCC CAT ACC TGG G-3'              |
| M153A           | 5'-GCC GAA TTC GTG GTC GGC GCG TCG CTG GGC GGG TTG-3'            |
| S154A           | 5'-GCC GAA TTC GTG GTC GGC ATG GCG CTG GGC GGG TTG ACT GCG-3'    |
| L155A           | 5'-CGT GGT CGG CAT GTC GGC GGC GGG CGG GTT GAC TGC G-3'          |
| D178A           | 5'- CGG CGA ACT CGT TCT CGT CGC CGT CAC CCC GTC GGC ATT GC-3'    |
| L184A           | 5'- CGT CAC CCC GTC GGC AGC GCA ACG GCA CGC CGA GC-3'            |
| H187A           | 5'- CCG TCG GCA TTG CAA CGG GCC GCC GAG CTG ACC GCC G-3'         |
| H187D           | 5'-CCG TCG GCA TTG CAA CGG GAC GCC GAG CTG ACC GCC G-3'          |
| H187F           | 5'-CCG TCG GCA TTG CAA CGG TTC GCC GAG CTG ACC GCC G-3'          |
| H187G           | 5'-CCG TCG GCA TTG CAA CGG GGC GCC GAG CTG ACC GCC G-3'          |
| H187K           | 5'-CCG TCG GCA TTG CAA CGG AAG GCC GAG CTG ACC GCC G-3'          |
| H187N           | 5'- CCG TCG GCA TTG CAA CGG AAC GCC GAG CTG ACC GCC G-3'         |
| H187P           | 5'-CCG TCG GCA TTG CAA CGG CCC GCC GAG CTG ACC GCC G-3'          |
| H187S           | 5'-CCG TCG GCA TTG CAA CGG AGC GCC GAG CTG ACC GCC G-3'          |
| H187V           | 5'-CCG TCG GCA TTG CAA CGG GTC GCC GAG CTG ACC GCC G-3'          |
| H187W           | 5'- CCG TCG GCA TTG CAA CGG TGG GCC GAG CTG ACC GCC G-3'         |
| H187Y           | 5'-CCG TCG GCA TTG CAA CGG TAT GCC GAG CTG ACC GCC G-3'          |
| Q194A           | 5'-CCG AGC TGA CCG AGG CGC GCG GCA CGG TGG CG-3'                 |
| R195A           | 5'-GAG CTG ACC GCC GAG CAG GCC GGC ACG GTG GCG C-3'              |
| G196A           | 5'-ACC GCC GAG CAG CGC GCC ACG GTG GC-3'                         |
| T197A           | 5'-GCC GAG CAG CGA GGT GCA GTG GCG CTG ATG CAC GG-3'             |
| V198A           | 5'-CGC GGC ACG GCT GCG CTG ATG CAC GGC G-3'                      |
| L200A           | 5'-GGC ACG GTG GCG GCA ATG CAC GGC GAG CGG-3'                    |
| M201A           | 5'-GCG GCA CGG TGG CGC TGG CAC ACG GC-3'                         |
| H202A           | 5'-GCA CGG TGG CGC TGA TGG CGG GCG AGC GGG AAT TCC-3'            |
| G203A           | 5'-GGT GGC GCT GAT GCA CGC CGA GCG GGA ATT CCC C-3'              |
| E204A           | 5'-GCG CTG ATG CAC GGC GCG CGG GAA TTC CCC-3'                    |
| I252A           | 5'- GGG TGT GGC GCT ATG ACG CGG CCC GCA CGT TCG GAG ATT TCG C-3' |
| F255A           | 5'- GAC GCG ATC CGC ACG GCC GGA GAT TTC GC-3'                    |
| F282A           | 5'- GCG CGG CGG CTC GTC GGG CGC AGT CAC CGA CCA GGA CAC CGC-3'   |
| H309A           | 5'- CGT CGA GAA GTC AGG CGC CTC GGT GCA AAG TGA CC-3'            |

<sup>a</sup>Primers for mutagenesis are one of the two complementary primers used in the mutagenesis reaction. Mutagenic PCR reactions were subjected to the following thermal cycle using a BIO-RAD MyCycler™: 1) initial denaturation at 95°C for 30 s, 2) denaturation at 95°C for 30 s, 3) annealing at temperatures between 52 – 60°C for 60 s, 4) extension at 68°C for 14 min. Steps 2-4 were repeated 16 times.

## Supplemental Figure 1

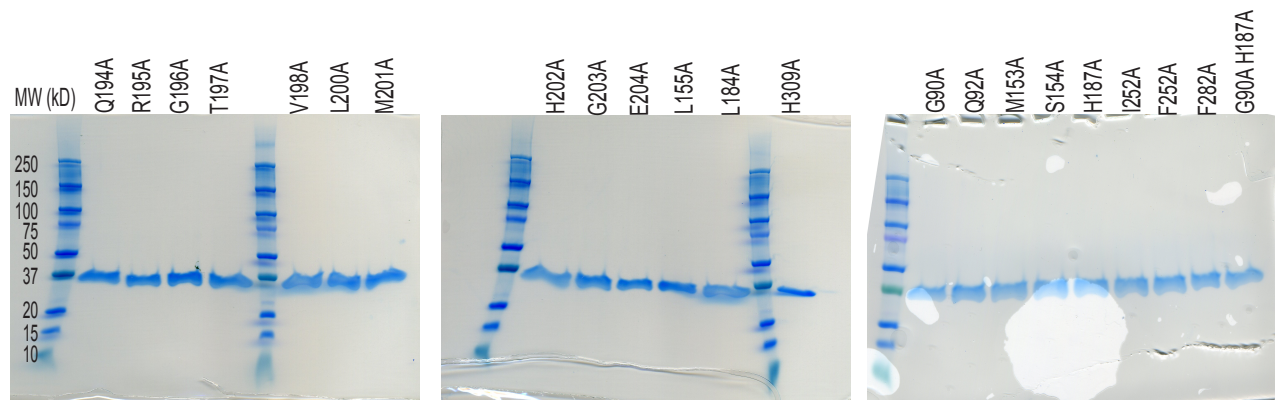

**Supplemental Figure 1: Protein purification of variants of Rv0045c.** Each Rv0045c variant was constructed and purified as described in the Experimental Section. The expected molecular weight of Rv0045c is 35.5 kDa. Each variant (2  $\mu$ g) was loaded onto the 4-20% Tris-glycine gel and run at 150 V for 45 minutes. The molecular weight was confirmed by comparison to the Kaleidoscope prestained protein standard (Bio-rad laboratories).

## Supplemental Figure 2

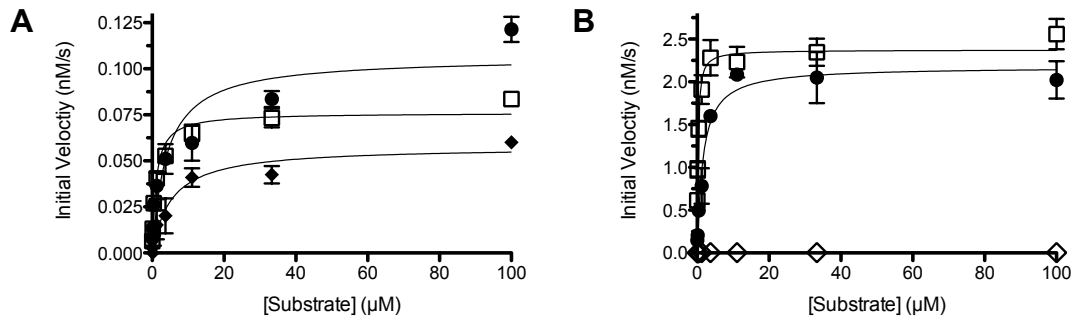

**Supplemental Figure 2: Kinetic activity of Rv0045c. A)** Kinetic activity of wild-type Rv0045c against substrates 2 (closed circles), 3 (open squares), and 4 (closed diamonds). All measurements were completed in triplicate and shown  $\pm$  SE. Data were fitted to the Michaelis-Menten equation using Graphpad Prism 5.0. **B)** Kinetic activity of Rv0045c variants. The kinetic activity of S154A (open diamonds), H187A (closed circles), and H187Y (open squares) were determined and plotted the same as part A.
